# Supplementary material for: Micron-Sized Monodisperse Particle LiNi0.6Co0.2Mn0.2O2 Derived by Oxalate Solvothermal Process Combined with Calcination as Cathode Material for Lithium-Ion Batteries
Source: Materials (Basel). 2021 May 15;14(10):2576. doi: 10.3390/ma14102576 (PMC8155954; doi:10.3390/ma14102576)
Supplement: Supplementary file 1 [file materials-14-02576-s001.zip › materials-1204373-supplementary.pdf]

Supplementary Materials

# Micron-Sized Monodisperse Particle $\text{LiNi}_{0.6}\text{Co}_{0.2}\text{Mn}_{0.2}\text{O}_2$ Derived by Oxalate Solvothermal Process Combined with Calcination as Cathode Material for Lithium-Ion Batteries

Zhuo Chen, Fangya Guo and Youxiang Zhang \*

College of Chemistry and Molecular Sciences, Wuhan University, Wuhan 430072, China; chenzhuo0005@whu.edu.cn (Z.C); guofangya@whu.edu.cn (F.G.)

\* Correspondence: yxzhang04@whu.edu.cn

**Citation:** Chen, Z.; Guo, F.; Zhang, Y. Micron-sized monodisperse particle  $\text{LiNi}_{0.6}\text{Co}_{0.2}\text{Mn}_{0.2}\text{O}_2$  derived by oxalate solvothermal process combined with calcination as cathode material for lithium-ion batteries. *Materials* **2021**, *14*, x. <https://doi.org/10.3390/xxxxx>

Academic Editor: Carlos Fernandez

Received: 15 April 2021

Accepted: 13 May 2021

Published: May 2021

**Publisher's Note:** MDPI stays neutral with regard to jurisdictional claims in published maps and institutional affiliations.

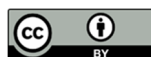

**Copyright:** © 2021 by the authors. Licensee MDPI, Basel, Switzerland. This article is an open access article distributed under the terms and conditions of the Creative Commons Attribution (CC BY) license (<http://creativecommons.org/licenses/by/4.0/>).

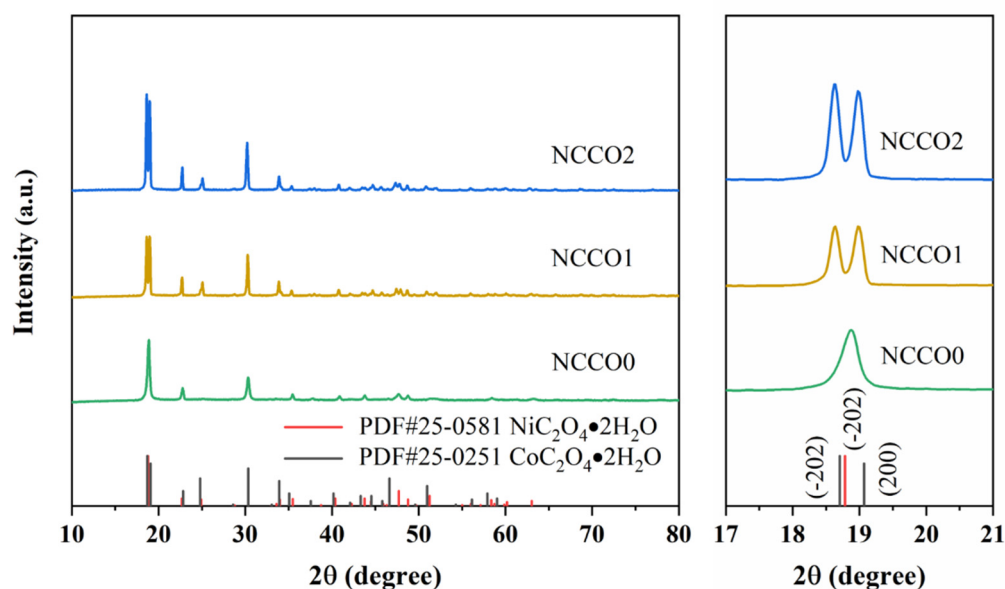

**Figure S1.** XRD patterns of NCCO precursor samples.

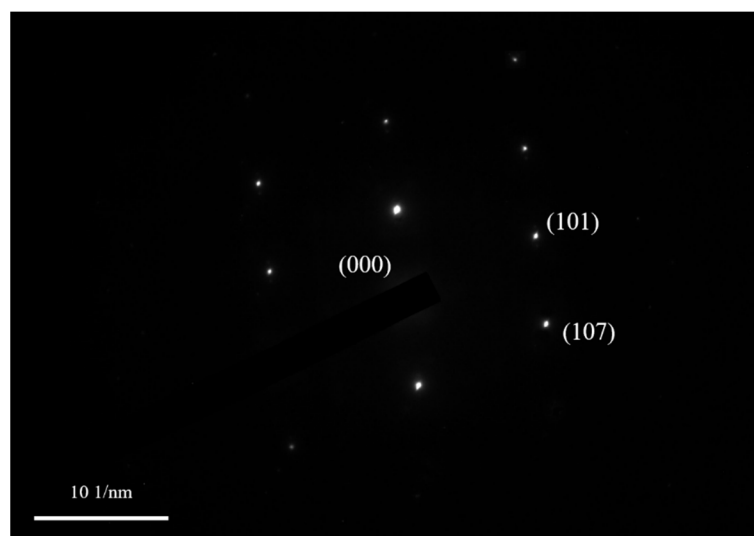

**Figure S2.** SAED patterns of NCM800.

**Table S1** The atomic ratios of NCM622 tested by SEM-EDX.

| Sample | Ni (%) | Co (%) | Mn (%) |
|--------|--------|--------|--------|
| NCM750 | 58.42  | 20.71  | 20.87  |
| NCM800 | 59.21  | 20.28  | 20.51  |
| NCM850 | 58.14  | 21.04  | 20.82  |

**Table S2** EIS fitting results of the equivalent circuit of NCM622.

| Samples | 1st cycle          |                       | 50th cycle         |                    |                       |
|---------|--------------------|-----------------------|--------------------|--------------------|-----------------------|
|         | $R_s$ ( $\Omega$ ) | $R_{ct}$ ( $\Omega$ ) | $R_s$ ( $\Omega$ ) | $R_f$ ( $\Omega$ ) | $R_{ct}$ ( $\Omega$ ) |
| NCM750  | 3.24               | 198.8                 | 4.81               | 54.22              | 380.6                 |
| NCM800  | 1.92               | 189.1                 | 2.83               | 54.38              | 217.7                 |
| NCM850  | 3.72               | 217.7                 | 5.09               | 81.81              | 283.0                 |
